# Supplementary material for: Gradual Glucocorticosteroid Withdrawal Is Safe in Clinically Quiescent Systemic Lupus Erythematosus
Source: PubMed Central journal article supplement — ACR Open Rheumatol. 2021 Jul 10;3(8):550–7. doi: 10.1002/acr2.11267 (PMC8363847; doi:10.1002/acr2.11267), 2021-07-10
Supplement: ACR2-3-550-s001.pdf [file ACR2-3-550-s001.pdf]

**Clinical remission for all patients  
(clinical SLEDAI-2K=0)**

**Follow-up period  
(bars represent any clinical flare as  
defined by any increase in clinical  
SLEDAI-2K)**

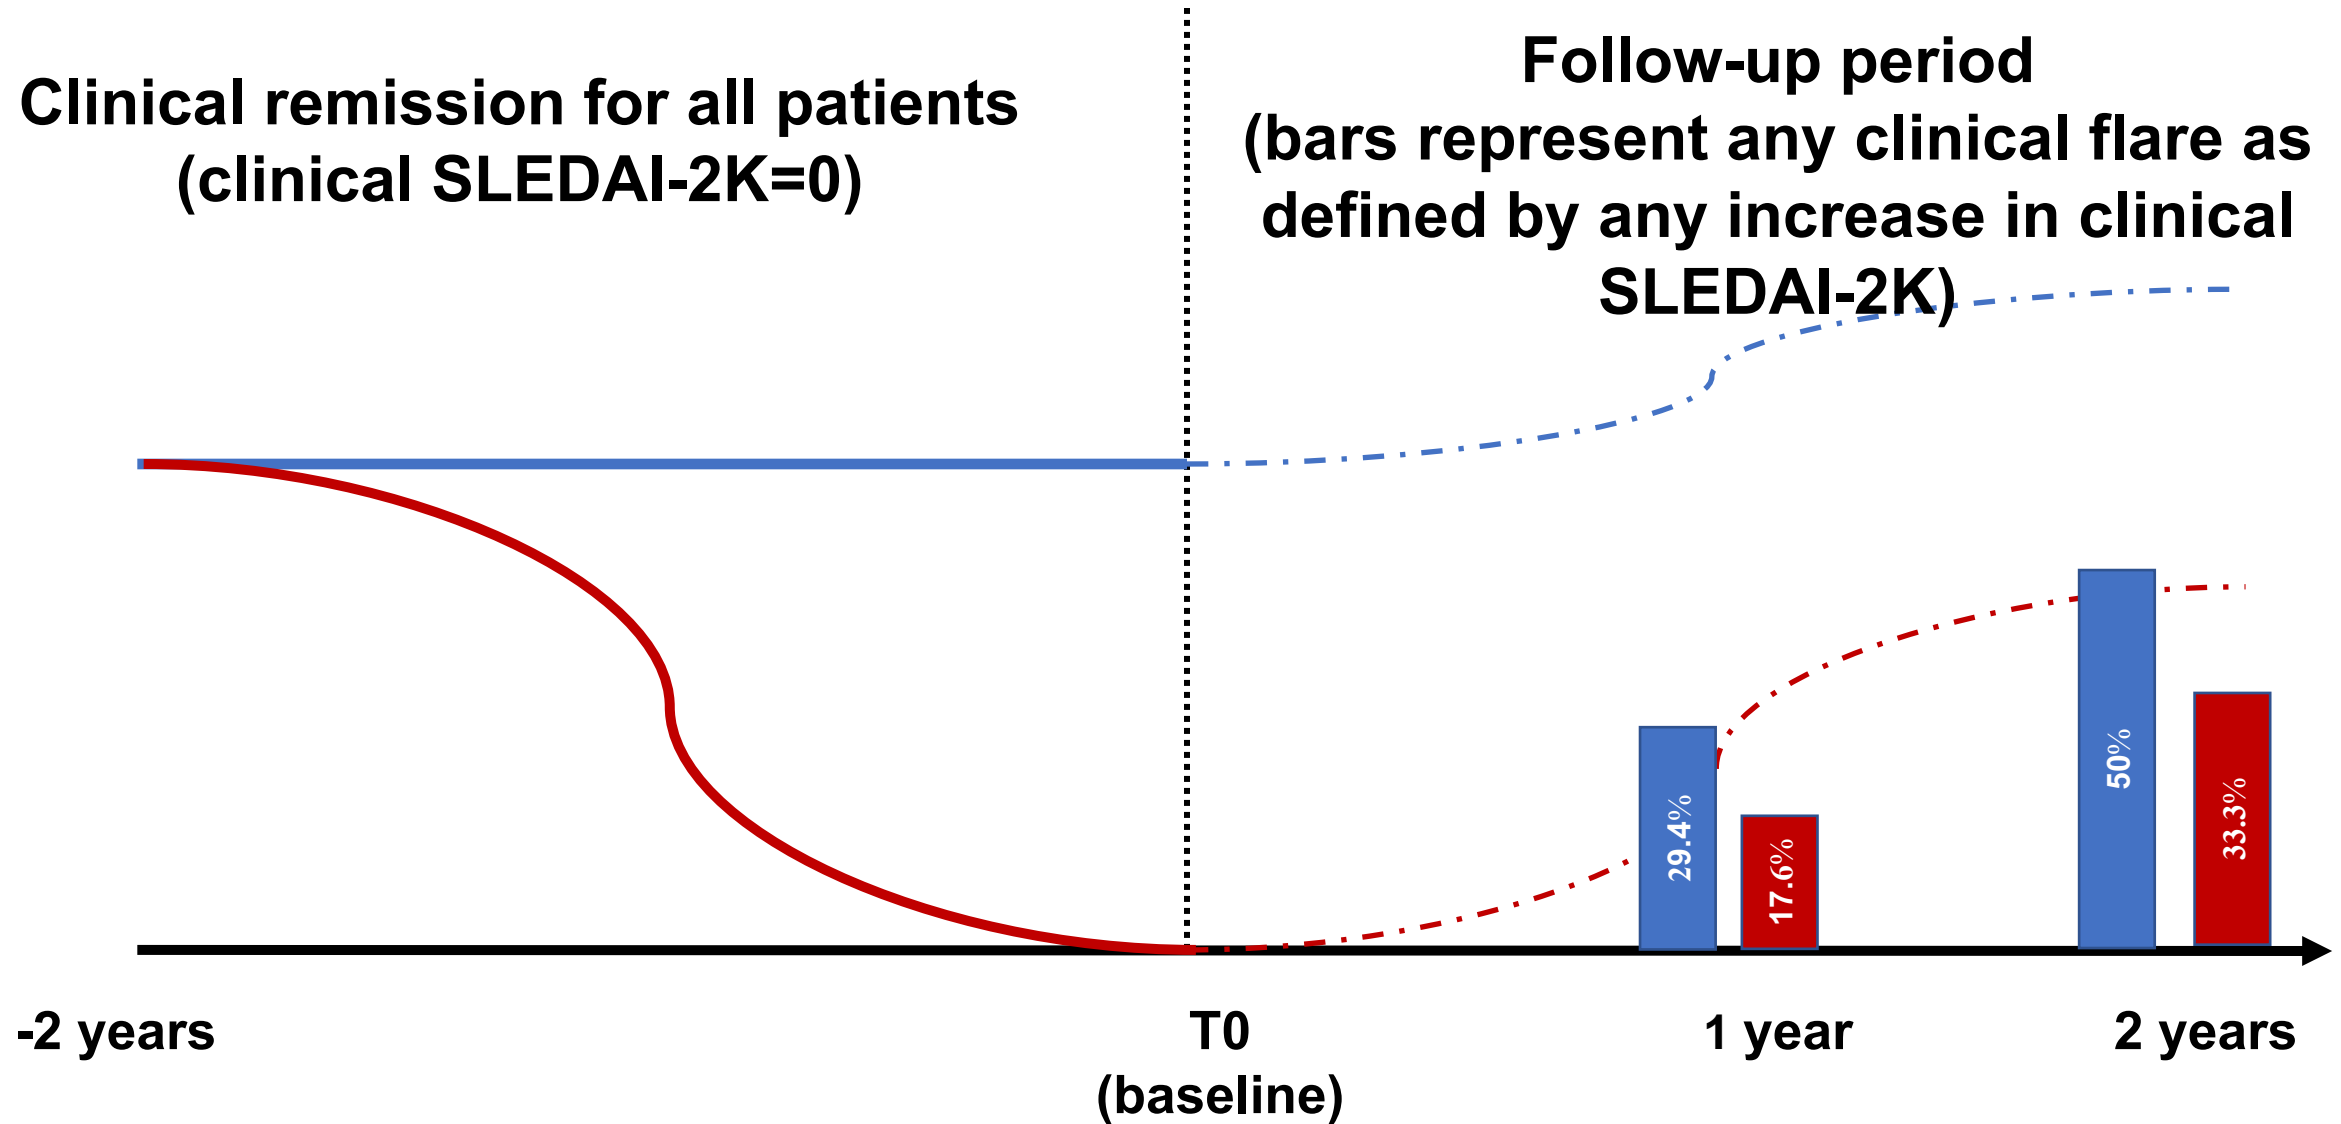

— Maintenance group (N=102)  
— Withdrawal group (N=102)

\* Solid lines represent the daily prednisone dose during the observation period  
\*\* Dashed lines represent the possible increase in prednisone dose since some patients flared
